# Supplementary material for: Urinary biomarkers of polycyclic aromatic hydrocarbons in pre- and peripubertal girls in Northern California: Predictors of exposure and temporal variability
Source: PubMed Central journal article supplement — Environ Res. Author manuscript; Available in PMC 2019 Aug 1. (PMC5999561; doi:10.1016/j.envres.2017.11.011), 2018-04-14
Supplement: NIHMS960230-supplement-1.pdf [file NIHMS960230-supplement-1.pdf]

Table S1. **Demographics plus BMI model.** Change in ln(urinary PAH biomarkers) ( $\beta$ ) adjusted for age, race, income, BMI percentile<sup>1</sup>, and ln(creatinine).

|                             | 1-naphthol                      |             | 2-naphthol                      |             | $\Sigma$ fluorene               |             | $\Sigma$ phenanthrene           |             | 1-hydroxypyrene                 |             |
|-----------------------------|---------------------------------|-------------|---------------------------------|-------------|---------------------------------|-------------|---------------------------------|-------------|---------------------------------|-------------|
|                             | e <sup><math>\beta</math></sup> | 95% CI      |
| Age (years)                 |                                 |             |                                 |             |                                 |             |                                 |             |                                 |             |
| 6.0-6.9                     | 0.91                            | (0.68-1.21) | 1.06                            | (0.88-1.27) | 1.19                            | (1.07-1.33) | 1.13                            | (1.01-1.27) | 1.11                            | (0.96-1.27) |
| $\geq 7.0$                  | 1                               | -           | 1                               | -           | 1                               | -           | 1                               | -           | 1                               | -           |
| Race                        |                                 |             |                                 |             |                                 |             |                                 |             |                                 |             |
| Black                       | 0.76                            | (0.54-1.07) | 1.11                            | (0.89-1.38) | 0.98                            | (0.86-1.12) | 0.91                            | (0.79-1.04) | 1.09                            | (0.93-1.28) |
| Hispanic                    | 1.79                            | (0.57-1.11) | 1.65                            | (1.33-2.05) | 0.98                            | (0.86-1.12) | 0.99                            | (0.86-1.13) | 1.07                            | (0.91-1.26) |
| Asian                       | 0.84                            | (0.56-1.25) | 1.33                            | (1.03-1.72) | 1.02                            | (0.87-1.19) | 1.14                            | (0.97-1.34) | 1.24                            | (1.02-1.50) |
| White                       | 1                               | -           | 1                               | -           | 1                               | -           | 1                               | -           | 1                               | -           |
| Household income (dollars)  |                                 |             |                                 |             |                                 |             |                                 |             |                                 |             |
| <50,000                     | 1.04                            | (0.72-1.48) | 1.38                            | (1.09-1.74) | 1.10                            | (0.95-1.26) | 1.01                            | (0.87-1.16) | 1.07                            | (0.90-1.27) |
| 50,000 – 100,000            | 0.90                            | (1.68-1.19) | 1.11                            | (0.93-1.33) | 0.98                            | (0.88-1.09) | 0.94                            | (0.84-1.06) | 0.96                            | (0.84-1.10) |
| $\geq 100,000$              | 1                               | -           | 1                               | -           | 1                               | -           | 1                               | -           | 1                               | -           |
| BMI percentile <sup>2</sup> |                                 |             |                                 |             |                                 |             |                                 |             |                                 |             |
| <50 <sup>th</sup>           | 1                               | -           | 1                               | -           | 1                               | -           | 1                               | -           | 1                               | -           |
| 50-84 <sup>th</sup>         | 0.89                            | (0.66-1.19) | 0.90                            | (0.75-1.08) | 0.96                            | (0.86-1.08) | 0.94                            | (0.84-1.06) | 0.94                            | (0.82-1.08) |
| $\geq 85^{\text{th}}$       | 0.97                            | (0.71-1.33) | 1.11                            | (0.90-1.35) | 1.08                            | (0.96-1.22) | 1.07                            | (0.94-1.22) | 1.01                            | (0.87-1.18) |
| ln(creatinine), continuous  | 2.25                            | (1.85-2.74) | 2.82                            | (2.48-3.20) | 2.49                            | (2.30-2.69) | 2.53                            | (2.33-2.74) | 2.34                            | (2.12-2.58) |

<sup>1</sup>No relationship between BMI and PAHs levels, BMI was removed from multivariable models with exposures

<sup>2</sup>Age- and sex-specific BMI percentile based on 2000 growth charts from CDC

Abbreviations: CI confidence interval

Table S2. Spearman correlations of urinary PAH biomarkers.

|                              | 2-naphthol     | 2-hydroxyfluorene | 3-hydroxyfluorene | 9-hydroxyfluorene | 1-hydroxyphenanthrene | 2-hydroxyphenanthrene | 3-hydroxyphenanthrene | 4-hydroxyphenanthrene | 1-hydroxypyrene <sup>1</sup> |
|------------------------------|----------------|-------------------|-------------------|-------------------|-----------------------|-----------------------|-----------------------|-----------------------|------------------------------|
| 1-naphthol                   | 0.34<br><.0001 | 0.38<br><.0001    | 0.4<br><.0001     | 0.44<br><.0001    | 0.45<br><.0001        | 0.39<br><.0001        | 0.41<br><.0001        | 0.37<br><.0001        | 0.33<br><.0001               |
| 1-hydroxypyrene <sup>1</sup> | 0.43<br><.0001 | 0.75<br><.0001    | 0.68<br><.0001    | 0.67<br><.0001    | 0.78<br><.0001        | 0.77<br><.0001        | 0.8<br><.0001         | 0.53<br><.0001        |                              |
| 4-hydroxyphenanthrene        | 0.28<br><.0001 | 0.56<br><.0001    | 0.52<br><.0001    | 0.61<br><.0001    | 0.64<br><.0001        | 0.62<br><.0001        | 0.61<br><.0001        |                       |                              |
| 3-hydroxyphenanthrene        | 0.47<br><.0001 | 0.82<br><.0001    | 0.79<br><.0001    | 0.8<br><.0001     | 0.86<br><.0001        | 0.88<br><.0001        |                       |                       |                              |
| 2-hydroxyphenanthrene        | 0.49<br><.0001 | 0.83<br><.0001    | 0.75<br><.0001    | 0.77<br><.0001    | 0.84<br><.0001        |                       |                       |                       |                              |
| 1-hydroxyphenanthrene        | 0.44<br><.0001 | 0.82<br><.0001    | 0.74<br><.0001    | 0.79<br><.0001    |                       |                       |                       |                       |                              |
| 9-hydroxyfluorene            | 0.46<br><.0001 | 0.74<br><.0001    | 0.66<br><.0001    |                   |                       |                       |                       |                       |                              |
| 3-hydroxyfluorene            | 0.5<br><.0001  | 0.89<br><.0001    |                   |                   |                       |                       |                       |                       |                              |
| 2-hydroxyfluorene            | 0.54<br><.0001 |                   |                   |                   |                       |                       |                       |                       |                              |

<sup>1</sup>The total number of samples for this analyte is 429.

Table S3. Characteristics BCERP CA site at baseline by 1-naphthol:2-naphthol ratio.

|                                                                  | Ratio at or below 2 |    | Ratio above 2    |    | p-value |
|------------------------------------------------------------------|---------------------|----|------------------|----|---------|
|                                                                  | N                   | %  | N                | %  |         |
| Age (years)                                                      |                     |    |                  |    | 0.77    |
| 6.0-6.9                                                          | 78                  | 24 | 24               | 23 |         |
| 7.0-7.9                                                          | 241                 | 74 | 81               | 76 |         |
| ≥8.0                                                             | 6                   | 2  | 1                | 1  |         |
| Child race/ethnicity                                             |                     |    |                  |    | 0.02    |
| Black                                                            | 75                  | 23 | 21               | 20 |         |
| Hispanic                                                         | 89                  | 27 | 17               | 16 |         |
| Asian                                                            | 41                  | 13 | 11               | 10 |         |
| White                                                            | 120                 | 37 | 57               | 54 |         |
| BMI percentile <sup>1</sup>                                      |                     |    |                  |    | 0.67    |
| <50 <sup>th</sup>                                                | 106                 | 33 | 38               | 36 |         |
| 50 <sup>th</sup> – 85 <sup>th</sup>                              | 119                 | 37 | 40               | 37 |         |
| >85 <sup>th</sup>                                                | 100                 | 31 | 28               | 26 |         |
| Parent or guardian education                                     |                     |    |                  |    | <.001   |
| High school or less                                              | 74                  | 23 | 8                | 8  |         |
| Some college                                                     | 108                 | 33 | 24               | 23 |         |
| Bachelor's degree or greater                                     | 142                 | 44 | 73               | 70 |         |
| Household income (dollars)                                       |                     |    |                  |    | 0.12    |
| <50,000                                                          | 73                  | 23 | 18               | 17 |         |
| 50,000 – 100,000                                                 | 121                 | 38 | 34               | 32 |         |
| ≥100,000                                                         | 125                 | 39 | 53               | 50 |         |
| Cotinine (µg/L)                                                  | GM (95%CI)          |    | GM (95% CI)      |    | 0.19    |
|                                                                  | 0.27 (0.23-0.31)    |    | 0.22 (0.17-0.29) |    |         |
| Grilled food in last 2 days                                      |                     |    |                  |    | 0.52    |
| Yes                                                              | 68                  | 21 | 19               | 18 |         |
| No                                                               | 256                 | 79 | 86               | 82 |         |
| Distance weighted traffic density (highest AADT in 150 m buffer) |                     |    |                  |    | 0.75    |
| Local traffic                                                    | 94                  | 29 | 27               | 26 |         |
| <1813.47                                                         | 60                  | 18 | 18               | 17 |         |
| 1813.47-4536.87                                                  | 60                  | 18 | 17               | 16 |         |
| 4536.88-9727.07                                                  | 54                  | 17 | 23               | 22 |         |
| ≥9727.08                                                         | 57                  | 18 | 20               | 19 |         |
| Season of urine collection                                       |                     |    |                  |    | <.001   |
| Spring (March-May)                                               | 86                  | 27 | 31               | 29 |         |
| Summer (June-August)                                             | 143                 | 44 | 23               | 22 |         |
| Fall (September-November)                                        | 48                  | 15 | 35               | 33 |         |

|                                 |     |    |    |    |      |
|---------------------------------|-----|----|----|----|------|
| Winter (December-February)      | 48  | 15 | 17 | 16 |      |
| Region of residence at baseline |     |    |    |    | 0.17 |
| Marin County                    | 76  | 23 | 18 | 17 |      |
| San Francisco                   | 57  | 18 | 26 | 25 |      |
| East Bay                        | 192 | 59 | 62 | 58 |      |

---

<sup>1</sup>Age- and sex-specific BMI percentile based on 2000 growth charts from CDC
